# Supplementary material
Source: publisher figshare collection journal article supplement (https://karger.figshare.com/ndownloader/files/35902904)
Supplement: Supplementary file 1 [file 35902904]

**Supplementary Figure 2:** Proportions of B cells, macrophages, CD4+ T cells, CD8+ T cells and regulatory T cells estimated using the CIBERSORT algorithm. Results are shown in boxplot format, with cell types indicated along the X-axis and the estimated cell proportion plotted along the Y-axis. The resulting P-value is indicated in the top left corner.
